# Supplementary material
Source: publisher site journal article supplement (https://www.dovepress.com/article/537142)
Supplement: Supplementary file 1 [file 537142%20Supplementary%20materials_1.pdf]

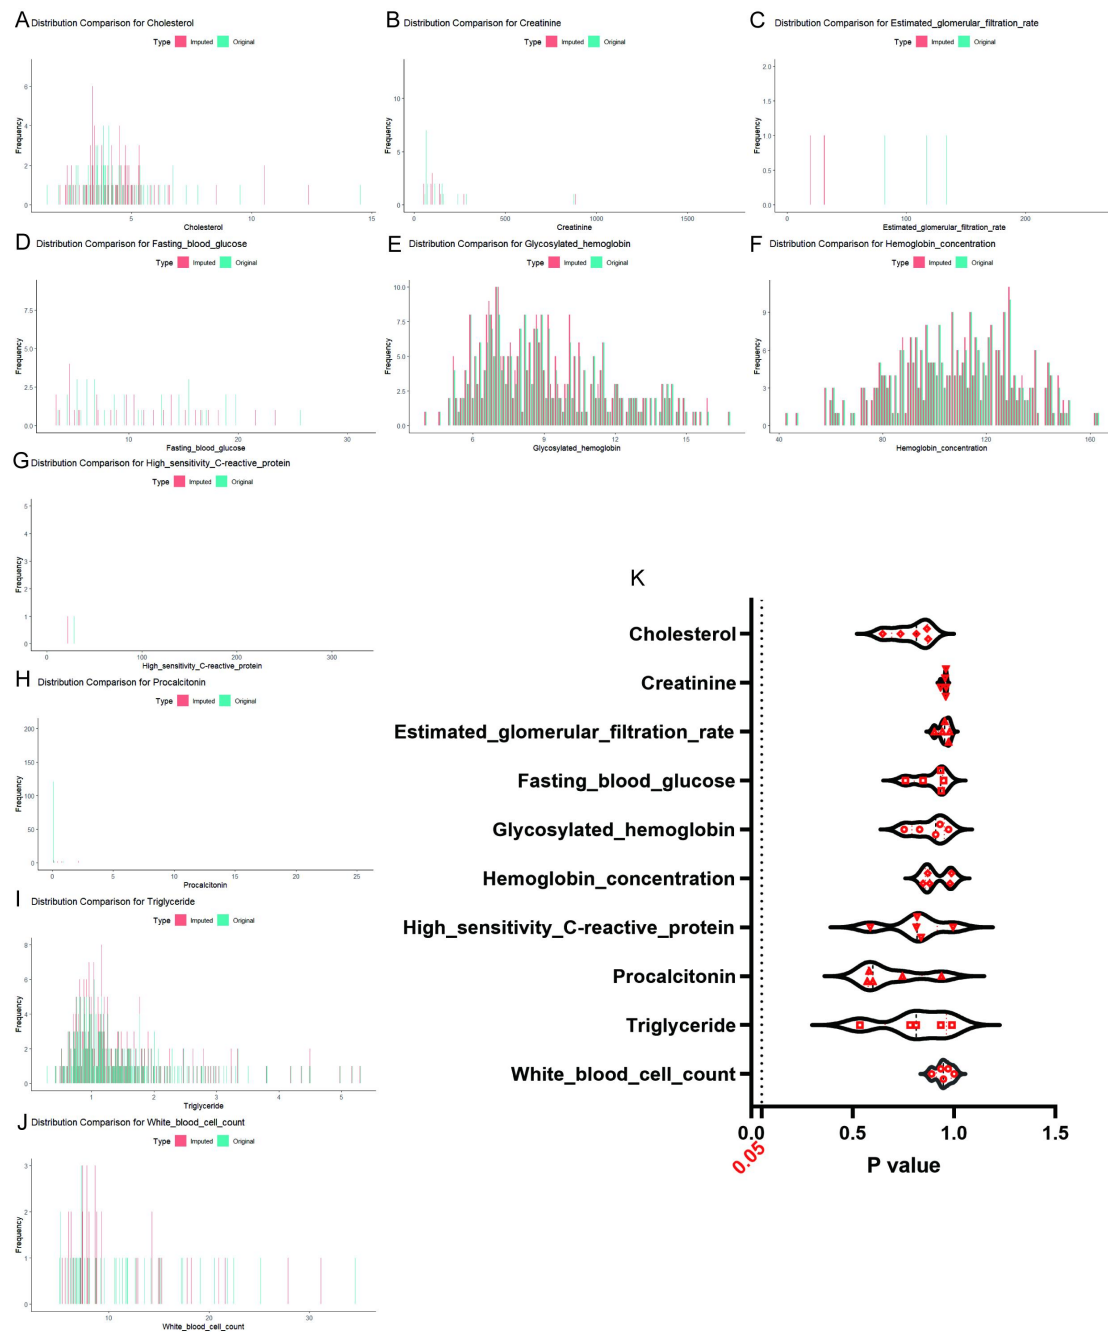

**Supplementary Figure 1. Distribution comparison between original and imputed data for key laboratory variables.**

Histograms display the frequency distributions of (A) cholesterol, (B) creatinine, (C) estimated glomerular filtration rate, (D) fasting blood glucose, (E) glycosylated hemoglobin (HbA1c), (F) hemoglobin concentration, (G) high-sensitivity C-reactive protein (hs-CRP), (H) procalcitonin, (I) triglyceride, and (J) white blood cell count before (blue) and after (orange) multiple-imputation. Overlapping distributions demonstrate that the imputation process preserved the statistical properties of the original data (all  $P > 0.05$  by independent t-tests).

**Supplementary Table 1** Comparison of charlson comorbidity index corresponding indicators between Non-MDRB and MDRB Groups

|                                        | score | Non-MDRB<br>(n=231) | MDRB<br>(n=113) | <i>P</i> values* |
|----------------------------------------|-------|---------------------|-----------------|------------------|
|                                        | 0     | 22(9.52%)           | 12(10.62%)      |                  |
|                                        | 1     | 59(25.54%)          | 32(28.32%)      |                  |
| Age CCI                                | 2     | 57(24.68%)          | 36(31.86%)      | 0.1863           |
|                                        | 3     | 67(29.00%)          | 21(18.58%)      |                  |
|                                        | 4     | 26(11.26%)          | 12(10.62%)      |                  |
| With Myocardial infarction             |       | 8(3.46%)            | 4(3.54%)        | 0.9725           |
| With Congestive heart failure          |       | 32(13.85%)          | 16(14.16%)      | 0.9394           |
| With Peripheral vascular disease       |       | 228(98.70%)         | 109(96.46%)     | 0.1681           |
| With Cerebrovascular disease           |       | 73(31.60%)          | 23(20.35%)      | 0.0292*          |
| With Dementia                          |       | 3(1.30%)            | 2(1.77%)        | 0.7341           |
| With Chronic pulmonary disease         |       | 18(7.79%)           | 9(7.96%)        | 0.9565           |
| With Connective tissue disease         |       | 0(0%)               | 1(0.09%)        | 0.7394           |
|                                        | 0     | 226(97.84%)         | 113(100%)       |                  |
| With Hepatopathy                       | 1     | 4(1.73%)            | 0(0%)           | 0.1163           |
|                                        | 3     | 1(0.04%)            | 0(0%)           |                  |
| With Diabetes                          |       | 230(99.96%)         | 130(99.91%)     | 0.6081           |
| With Hemiplegia                        |       | 14(6.06%)           | 3(2.65%)        | 0.1722           |
|                                        | 0     | 227(98.27%)         | 111(98.22%)     |                  |
| With Solid tumor                       | 2     | 4(1.73%)            | 1(0.09%)        | 0.9736           |
|                                        | 6     | 0(0%)               | 1(0.09%)        |                  |
| With Leukemia                          |       | 0(0%)               | 0(0%)           | >0.9999          |
| With Lymphoma                          |       | 0(0%)               | 0(0%)           | >0.9999          |
| With AIDS                              |       | 0(0%)               | 0(0%)           | >0.9999          |
| With Immunosuppressive drugs           |       | 6(2.60%)            | 0(0%)           | 0.0848           |
| With Renal disease                     |       | 29(12.55%)          | 17(15.04%)      | 0.5252           |
| With Hypertension (Yes,%)              |       | 137(59.03%)         | 65(57.52%)      | 0.753            |
| With Hematological diseases<br>(Yes,%) |       | 57(24.68%)          | 35(30.97%)      | 0.2161           |
| With Cardiovascular disease            |       | 181(78.35%)         | 82(72.57%)      | 0.2357           |
| With Cerebral infarction               |       | 73(31.6%)           | 25(22.12%)      | 0.0679           |

\*Indicates statistically significant data

**Supplementary Table 2** Comparison of charlson comorbidity index corresponding indicators between Non-PSA and PSA Groups

|                                     | score | Non-PSA (n=317) | PSA(n=27)  | P values* |
|-------------------------------------|-------|-----------------|------------|-----------|
|                                     | 0     | 32(10.09%)      | 2(7.41%)   |           |
|                                     | 1     | 86(27.13%)      | 5(18.52%)  |           |
| Age CCI                             | 2     | 86(27.13%)      | 7(25.93%)  | 0.1793    |
|                                     | 3     | 79(24.92%)      | 9(33.33%)  |           |
|                                     | 4     | 34(10.73%)      | 4(14.81%)  |           |
| With Myocardial infarction          |       | 7(2.21%)        | 5(18.52%)  | 0.0015*   |
| With Congestive heart failure       |       | 41(12.93%)      | 7(25.93%)  | 0.0784    |
| With Peripheral vascular disease    |       | 312(98.42%)     | 25(92.59%) | 0.0937    |
| With Cerebrovascular disease        |       | 85(26.81%)      | 11(40.74%) | 0.1792    |
| With Dementia                       |       | 4(1.26%)        | 1(3.70%)   | 0.3306    |
| With Chronic pulmonary disease      |       | 23(7.26%)       | 4(14.81%)  | 0.2533    |
| With Connective tissue disease      |       | 1(0.32%)        | 0(0%)      | 0.7814    |
|                                     | 0     | 312(98.42%)     | 27(100%)   |           |
| With Hepatopathy                    | 1     | 4(1.26%)        | 0(0%)      | >0.9999   |
|                                     | 3     | 1(0.32%)        | 0(0%)      |           |
| With Diabetes                       |       | 315(99.37%)     | 27(100%)   | >0.9999   |
| With Hemiplegia                     |       | 14(4.42%)       | 3(11.11%)  | 0.384     |
|                                     | 0     | 311(98.10%)     | 27(100%)   |           |
| With Solid tumor                    | 2     | 5(1.58%)        | 0(0%)      | >0.9999   |
|                                     | 6     | 1(0.32%)        | 0(0%)      |           |
| With Leukemia                       |       | 0(0%)           | 0(0%)      | >0.9999   |
| With Lymphoma                       |       | 0(0%)           | 0(0%)      | >0.9999   |
| With AIDS                           |       | 0(0%)           | 0(0%)      | >0.9999   |
| With Immunosuppressive drugs        |       | 6(1.89%)        | 0(0%)      | >0.9999   |
| With Renal disease                  |       | 44(13.88%)      | 2(7.41%)   | 0.4011    |
| With Hypertension (Yes,%)           |       | 182(57.41%)     | 20(74.07%) | 0.1078    |
| With Hematological diseases (Yes,%) |       | 85(26.81%)      | 7(25.93%)  | >0.9999   |
| With Cardiovascular disease         |       | 239(75.39%)     | 24(88.89%) | 0.1557    |
| With Cerebral infarction            |       | 87(27.44%)      | 11(40.74%) | 0.1831    |
| With Peptic ulcer disease           |       | 3(0.95%)        | 0(0%)      | 0.621     |

\*Indicates statistically significant data

**Supplementary Table 3** Univariate and Multivariate Analysis of Risk Factors (charlson comorbidity index corresponding indicators) for *PSA* Infections

|                                      | UVOR                   | 95%CI                | Coef.     | P value | MVOR  | 95%CI                  | Coef.   | P value |
|--------------------------------------|------------------------|----------------------|-----------|---------|-------|------------------------|---------|---------|
| Age CCI                              |                        |                      |           | 0.7431  |       |                        |         |         |
| Age CCI=1                            | 0.9302                 | 0.1718 to<br>5.0380  | -0.072321 |         |       |                        |         |         |
| Age CCI=2                            | 1.3023                 | 0.2569 to<br>6.6009  | 0.26415   |         |       |                        |         |         |
| Age CCI=3                            | 1.8228                 | 0.3731 to<br>8.9054  | 0.60037   |         |       |                        |         |         |
| Age CCI=4                            | 1.8824                 | 0.3223 to<br>10.9928 | 0.63252   |         |       |                        |         |         |
| Wirh Diabetes=2                      | 1.63 × 10 <sup>7</sup> |                      | 16.60561  | 0.5669  |       |                        |         |         |
| With Cardiovascular<br>disease=1     | 2.6109                 | 0.7653 to<br>8.9071  | 0.95969   | 0.0873  | 1.183 | 0.2283<br>to<br>6.1311 | 0.16803 | 0.8414  |
| With Cerebral<br>infarction=1        | 1.8175                 | 0.8115 to<br>4.0707  | 0.59748   | 0.1545  |       |                        |         |         |
| With Cerebrovascular<br>disease=1    | 1.8765                 | 0.8374 to<br>4.2051  | 0.62939   | 0.1344  |       |                        |         |         |
| With Chronic<br>Pulmonary Disease=1  | 2.2231                 | 0.7085 to<br>6.9751  | 0.79889   | 0.2025  |       |                        |         |         |
| With Congestive heart<br>failure=1   | 2.3561                 | 0.9379 to<br>5.9189  | 0.85701   | 0.0853  | 1.535 | 0.4256<br>to<br>5.5331 | 0.42828 | 0.5128  |
| With Connective tissue<br>disease=1  | 0                      | 0                    | -16.60244 | 0.6857  |       |                        |         |         |
| With Dementia=1                      | 3.0096                 | 0.3244 to<br>27.9208 | 1.10181   | 0.385   |       |                        |         |         |
| With Hematological<br>diseases=1     | 0.9553                 | 0.3900 to<br>2.3400  | -0.045736 | 0.9201  |       |                        |         |         |
| With Hemiplegia=2                    | 2.7054                 | 0.7267 to<br>10.0709 | 0.99523   | 0.1757  |       |                        |         |         |
| With Hepatopathy=1                   | 0                      | 0                    | -17.61518 | 0.6624  |       |                        |         |         |
| With Hepatopathy=3                   | 0                      | 0                    | -17.61518 |         |       |                        |         |         |
| With Hypertension=1                  | 2.1193                 | 0.8711 to<br>5.1560  | 0.75109   | 0.0832  | 1.097 | 0.3189<br>to<br>3.7713 | 0.09227 | 0.8836  |
| With<br>Immunosuppressive<br>drugs=1 | 8.21E-09               |                      | -18.61839 | 0.3198  |       |                        |         |         |
| With Peptic ulcer<br>disease=1       | 0                      | 0                    | -17.60879 | 0.4827  |       |                        |         |         |
| With Renal disease=1                 | 0.4964                 | 0.1135 to            | -0.70045  | 0.3086  |       |                        |         |         |

|                          |          |        |           |        |
|--------------------------|----------|--------|-----------|--------|
|                          |          | 2.1698 |           |        |
| With Solid tumor         |          |        |           | 0.6096 |
| With Solid tumor=2       | 8.21E-09 |        | -18.61839 |        |
| With Solid tumor=6       | 8.21E-09 |        | -18.61839 |        |
| With AIDS=0              |          |        |           |        |
| With Leukemia=0          |          |        |           |        |
| With Lymphoma=0          |          |        |           |        |
| ICU hospitalization days | 0        | 0      | -17.48085 | 0.3198 |
| Previous MRSA infection  | 0        | 0      | -17.60879 | 0.4827 |

---

UVOR: Univariate OR; Coef. : Coefficient; MVOR: Multivariate OR; \*Indicates statistically significant data

**Supplementary Table 4-1** Comparison of Clinical and Laboratory Parameters Between Non-MRSA and MRSA Groups

|                                               | Non-MRSA<br>(n=325) | MRSA<br>(n=19) | P<br>values |
|-----------------------------------------------|---------------------|----------------|-------------|
| Age (years)                                   | 65.18±12.08         | 63.84±10.41    | 0.5897      |
| Amputation (Yes,%)                            | 16(4.92%)           | 1(5.26%)       | 0.9496      |
| Charlson Comorbidity Index                    | 6.012±1.863         | 5.421±1.953    | 0.1205      |
| Cholesterol (mmol/L)                          | 4.176±1.425         | 4.687±2.134    | 0.1422      |
| Course of Diabetes (years)                    | 11.45±6.970         | 13.05±7.721    | 0.4518      |
| Course of Diabetes>10 years (Yes,%)           | 191(58.77%)         | 12(63.16%)     | 0.8128      |
| Creatinine (umol/L)                           | 185.5±265.0         | 127.3±86.92    | 0.341       |
| Diastolic pressure (mmHg)                     | 78.37±11.42         | 79.74±11.08    | 0.6149      |
| Estimated glomerular filtration rate (ml/min) | 68.87±41.10         | 71.50±40.83    | 0.7376      |
| Fasting blood glucose (mmol/L)                | 9.785±4.974         | 9.712±4.467    | 0.9011      |
| Gangrene (Yes,%)                              | 128(39.38%)         | 7(36.84%)      | 0.8267      |
| Gender (male,%)                               | 199(61.23%)         | 12(63.15%)     | 0.8673      |
| Glycosylated hemoglobin (%)                   | 9.061±2.646         | 9.153±2.485    | 0.585       |
| Hemoglobin concentration (g/L)                | 108.3±22.73         | 104.6±19.13    | 0.3797      |
| High sensitivity C-reactive protein (mg/L)    | 53.32±68.44         | 64.07±96.17    | 0.517       |
| Hospitalization days (days)                   | 19.69±14.16         | 23.47±12.97    | 0.1334      |
| ICU hospitalization days (days)               | 0.07385±0.7822      | 0              | 0.5543      |
| IDSA Severity>3 (Yes,%)                       | 127(39.08%)         | 8(42.11%)      | 0.8124      |
| Osteomyelitis (Yes,%)                         | 81(24.92%)          | 7(36.84%)      | 0.2798      |
| Osteoporosis (Yes,%)                          | 33(10.15%)          | 3(15.79%)      | 0.4339      |
| Previous hospitalization (Yes,%)              | 177(54.46%)         | 10(52.63%)     | 0.8776      |
| Previous MRSA infection (Yes,%)               | 2(0.62%)            | 2(10.53%)      | 0.1571      |
| Previous use of antibacterial drugs (Yes,%)   | 103(31.69%)         | 3(15.79%)      | 0.2018      |
| Procalcitonin (ng/ml)                         | 0.4230±1.543        | 0.1974±0.1556  | 0.5248      |
| Pulse (BPM)                                   | 87.29±12.39         | 90.37±12.09    | 0.3984      |
| Respiration (BPM)                             | 18.01±1.235         | 18.00±0.9428   | 0.9847      |
| Smoke (Yes,%)                                 | 83(25.54%)          | 4(21.05%)      | 0.791       |
| Systolic pressure (mmHg)                      | 136.8±20.22         | 136.4±19.36    | 0.7366      |
| Temperature (°C)                              | 36.66±0.4736        | 36.48±0.3276   | 0.1008      |
| Triglyceride (mmol/L)                         | 1.439±0.8279        | 1.246±0.6262   | 0.3191      |
| Types of antibacterial drugs (≥2,%)           | 40(12.31%)          | 3(15.79%)      | 0.7177      |
| Ulcer surface area (cm <sup>2</sup> )         | 20.32±30.28         | 14.24±18.58    | 0.3871      |
| White blood cell count (×10 <sup>9</sup> /L)  | 10.41±5.323         | 10.36±5.038    | 0.9691      |

**Supplementary Table 4-2** Comparison of charlson comorbidity index corresponding indicators Between *MRSA* and Non-*MRSA* Groups

|                                     | score | Non- <i>MRSA</i><br>(n=325) | <i>MRSA</i><br>(n=19) | <i>P</i> values |
|-------------------------------------|-------|-----------------------------|-----------------------|-----------------|
|                                     | 0     | 32(9.85%)                   | 2(10.52%)             |                 |
|                                     | 1     | 85(26.15%)                  | 6(31.58%)             |                 |
| Age CCI                             | 2     | 87(26.77%)                  | 6(31.58%)             | 0.4769          |
|                                     | 3     | 85(26.15%)                  | 3(15.79%)             |                 |
|                                     | 4     | 36(11.08%)                  | 2(10.53%)             |                 |
| With Myocardial infarction          |       | 12(3.69%)                   | 0(0%)                 | 0.637           |
| With Congestive heart failure       |       | 47(14.46%)                  | 1(5.26%)              | 0.335           |
| With Peripheral vascular disease    |       | 319(98.15%)                 | 18(94.74%)            | 0.3306          |
| With Cerebrovascular disease        |       | 93(28.62%)                  | 3(15.79%)             | 0.2977          |
| With Dementia                       |       | 5(1.54%)                    | 0(0%)                 | 0.5905          |
| With Chronic Pulmonary Disease      |       | 26(8.00%)                   | 5(26.32%)             | 0.6687          |
| With Connective tissue disease      |       | 0(0%)                       | 1(5.26%)              | 0.0552          |
|                                     | 0     | 320(98.46%)                 | 19(100%)              |                 |
| With Hepatopathy                    | 1     | 4(1.23%)                    | 0(0%)                 | 0.5905          |
|                                     | 3     | 1(0.31%)                    | 0(0%)                 |                 |
| With Diabetes                       |       | 323(99.38%)                 | 19(100%)              | 0.7388          |
| With Hemiplegia                     |       | 16(4.92%)                   | 1(5.26%)              | 0.9496          |
|                                     | 0     | 317(97.55%)                 | 19(100%)              |                 |
| With Solid tumor                    | 2     | 5(1.54%)                    | 0(0%)                 | >0.9999         |
|                                     | 6     | 1(0.31%)                    | 0(0%)                 |                 |
| With Leukemia                       |       | 0(0%)                       | 0(0%)                 | >0.9999         |
| With Lymphoma                       |       | 0(0%)                       | 0(0%)                 | >0.9999         |
| With AIDS                           |       | 0(0%)                       | 0(0%)                 | >0.9999         |
| With Immunosuppressive drugs        |       | 6(1.85%)                    | 0(0%)                 | >0.9999         |
| With Renal disease                  |       | 44(13.54%)                  | 2(10.53%)             | 0.7599          |
| With Hypertension (Yes,%)           |       | 189(58.15%)                 | 13(68.42%)            | 0.4753          |
| With Hematological diseases (Yes,%) |       | 85(26.15%)                  | 7(36.84%)             | 0.4231          |
| With Cardiovascular disease         |       | 247(76.00%)                 | 16(84.21%)            | 0.5806          |
| With Cerebral infarction            |       | 95(29.23%)                  | 3(15.79%)             | 0.2968          |
| With Peptic ulcer disease           |       | 3(0.92%)                    | 0(0%)                 | 0.6799          |

**Supplementary Table 5** Univariate and Multivariate Analysis of Risk Factors for *MRSA* Infections

|                                      | UVOR   | 95%CI               | Coef.         | P value | MVOR | 95% CI | Coef. | P value |
|--------------------------------------|--------|---------------------|---------------|---------|------|--------|-------|---------|
| Age                                  | 0.9907 | 0.9531 to<br>1.0298 | -0.00936      | 0.6353  |      |        |       |         |
| Age CCI                              |        |                     |               | 0.8756  |      |        |       |         |
| Age CCI=1                            | 1.1294 | 0.2167 to<br>5.8876 | 0.1217        |         |      |        |       |         |
| Age CCI=2                            | 1.1034 | 0.2117 to<br>5.7505 | 0.09844       |         |      |        |       |         |
| Age CCI=3                            | 0.5647 | 0.0902 to<br>3.5373 | -0.57145      |         |      |        |       |         |
| Age CCI=4                            | 0.8889 | 0.1183 to<br>6.6808 | -0.11778      |         |      |        |       |         |
| Amputation=1                         | 1.0729 | 0.1346 to<br>8.5494 | 0.070381      | 0.9475  |      |        |       |         |
| Charlson Comorbidity Index           | 0.8301 | 0.6316 to<br>1.0909 | -0.18626      | 0.1667  |      |        |       |         |
| Cholesterol                          | 1.1902 | 0.9393 to<br>1.5081 | 0.17414       | 0.186   |      |        |       |         |
| Course of disease                    | 1.0315 | 0.9689 to<br>1.0981 | 0.030985      | 0.3401  |      |        |       |         |
| Course of disease 10 years=1         | 1.2027 | 0.4614 to<br>3.1347 | 0.18456       | 0.7038  |      |        |       |         |
| Creatinine                           | 0.9986 | 0.9956 to<br>1.0016 | -0.00139<br>6 | 0.2705  |      |        |       |         |
| Diastolic pressure                   | 1.0105 | 0.9707 to<br>1.0520 | 0.010446      | 0.6119  |      |        |       |         |
| Estimated glomerular filtration rate | 1.0015 | 0.9905 to<br>1.0127 | 0.001540      | 0.7868  |      |        |       |         |
| Fasting blood glucose                | 0.997  | 0.9070 to<br>1.0958 | -0.00302<br>3 | 0.9499  |      |        |       |         |
| Gangrene=1                           | 0.8978 | 0.3443 to<br>2.3409 | -0.10782      | 0.8248  |      |        |       |         |
| Gender=1                             | 1.0854 | 0.4162 to<br>2.8306 | 0.081974      | 0.8665  |      |        |       |         |
| Glycosylated hemoglobin              | 1.0132 | 0.8512 to<br>1.2059 | 0.013081      | 0.8833  |      |        |       |         |
| Hemoglobin concentration             | 0.9928 | 0.9727 to<br>1.0133 | -0.00722<br>6 | 0.4886  |      |        |       |         |
| High sensitivity C reactive protein  | 1.002  | 0.9960 to<br>1.0079 | 0.001964      | 0.5312  |      |        |       |         |
| Hospitalization days                 | 1.0172 | 0.9875 to           | 0.017077      | 0.2735  |      |        |       |         |

|                                          |                      |                       |               |         |       |                     |        |       |
|------------------------------------------|----------------------|-----------------------|---------------|---------|-------|---------------------|--------|-------|
|                                          |                      | 1.0478                |               |         |       |                     |        |       |
| ICU hospitalization days                 | 0                    | 0                     | -16.4482<br>7 | 0.4068  |       |                     |        |       |
| IDSA Severity 3=1                        | 1.1339               | 0.4440 to<br>2.8957   | 0.12563       | 0.7935  |       |                     |        |       |
| Osteomyelitis=1                          | 1.7572               | 0.6692 to<br>4.6144   | 0.56372       | 0.2648  |       |                     |        |       |
| Osteoporosis=1                           | 1.6591               | 0.4592 to<br>5.9947   | 0.50627       | 0.4625  |       |                     |        |       |
| Previous hospitalization=1               | 0.9291               | 0.3678 to<br>2.3468   | -0.07357<br>7 | 0.8764  |       |                     |        |       |
| Previous MRSA infection=1                | 8.9722               | 0.7766 to<br>103.6598 | 2.19413       | 0.1345  |       |                     |        |       |
| Previous use of antibacterial<br>drugs=1 | 0.4041               | 0.1152 to<br>1.4177   | -0.90603      | 0.1218  |       |                     |        |       |
| Procalcitonin                            | 0.4936               | 0.1006 to<br>2.4209   | -0.70603      | 0.2243  |       |                     |        |       |
| Pulse                                    | 1.0198               | 0.9832 to<br>1.0578   | 0.019649      | 0.2952  |       |                     |        |       |
| Renal disease=1                          | 0.7513               | 0.1678 to<br>3.3647   | -0.2859       | 0.699   |       |                     |        |       |
| Respiration                              | 0.9958               | 0.6803 to<br>1.4578   | -0.00416<br>4 | 0.9829  |       |                     |        |       |
| Smoke=1                                  | 0.7775               | 0.2510 to<br>2.4088   | -0.25166      | 0.6559  |       |                     |        |       |
| Systolic pressure                        | 0.999                | 0.9762 to<br>1.0223   | -0.00100<br>6 | 0.9317  |       |                     |        |       |
| Temperature                              | 0.2111               | 0.0355 to<br>1.2560   | -1.55561      | 0.0444* | 0.192 | 0.03<br>to<br>1.228 | -1.653 | 0.081 |
| Triglyceride                             | 0.6876               | 0.3282 to<br>1.4406   | -0.37458      | 0.2773  |       |                     |        |       |
| Ulcer surface area                       | 0.991                | 0.9708 to<br>1.0116   | -0.00903<br>4 | 0.344   |       |                     |        |       |
| White blood cell count                   | 0.9983               | 0.9141 to<br>1.0902   | -0.00174<br>5 | 0.9689  |       |                     |        |       |
| Wirh Diabetes=2                          | 1.58×10 <sup>7</sup> |                       | 16.57522      | 0.633   |       |                     |        |       |
| With Cardiovascular<br>disease=1         | 1.6842               | 0.4781 to<br>5.9325   | 0.5213        | 0.3924  |       |                     |        |       |
| With Cerebral infarction=1               | 0.4539               | 0.1293 to<br>1.5941   | -0.78977      | 0.1825  |       |                     |        |       |
| With Cerebrovascular<br>disease=1        | 0.4677               | 0.1332 to<br>1.6430   | -0.75984      | 0.201   |       |                     |        |       |
| With Chronic Pulmonary                   | 0.6389               | 0.0820 to             | -0.44802      | 0.649   |       |                     |        |       |

|                                    |                      |                  |           |         |                      |        |       |
|------------------------------------|----------------------|------------------|-----------|---------|----------------------|--------|-------|
| Disease=1                          |                      | 4.9787           |           |         |                      |        |       |
| With Congestive heart failure=1    | 0.3286               | 0.0428 to 2.5204 | -1.1129   | 0.2083  |                      |        |       |
| With Connective tissue disease=1   | 3.15×10 <sup>9</sup> |                  | 21.87014  | 0.0156* | 3.44×10 <sup>9</sup> | 21.959 | 0.998 |
| With Dementia=1                    | 0                    | 0                | -17.58456 | 0.4493  |                      |        |       |
| With Hematological diseases=1      | 1.6471               | 0.6279 to 4.3207 | 0.49899   | 0.3215  |                      |        |       |
| With Hemiplegia=2                  | 1.0729               | 0.1346 to 8.5494 | 0.070381  | 0.9475  |                      |        |       |
| With Hepatopathy=1                 | 0                    | 0                | -17.58456 | 0.7511  |                      |        |       |
| With Hepatopathy=3                 | 0                    | 0                | -17.58456 |         |                      |        |       |
| With Hypertension=1                | 1.5591               | 0.5781 to 4.2049 | 0.4441    | 0.37    |                      |        |       |
| With Immunosuppressive drugs=1     | 0                    | 0                | -17.58769 | 0.4068  |                      |        |       |
| With Myocardial infarction=1       | 8.3E-09              |                  | -18.60667 | 0.2386  |                      |        |       |
| With Peptic ulcer disease=1        | 0                    | 0                | -17.57832 | 0.5584  |                      |        |       |
| With Peripheral vascular disease=1 | 0.3386               | 0.0387 to 2.9641 | -1.08306  | 0.3852  |                      |        |       |
| With Solid tumor                   |                      |                  |           | 0.7089  |                      |        |       |
| With Solid tumor=2                 | 0                    | 0                | -17.58769 |         |                      |        |       |
| With Solid tumor=6                 | 0                    | 0                | -17.58769 |         |                      |        |       |

---

UVOR: Univariate OR; Coef. : Coefficient; MVOR: Multivariate OR; \*Indicates statistically significant data

**Supplementary Table 6** Distribution of microbial species among 113 isolates from diabetic foot infections (n, %)

| <b>Detected bacterial strains</b>           | <b>Number</b> | <b>Percentage (%)</b> |
|---------------------------------------------|---------------|-----------------------|
| <b>Gram-positive bacteria</b>               | 62            | 54.9%                 |
| <i>Staphylococcus aureus</i>                | 34            | 30.1%                 |
| <i>Staphylococcus haemolyticus</i>          | 8             | 7.1%                  |
| <i>Enterococcus faecalis</i>                | 5             | 4.4%                  |
| <i>Staphylococcus epidermidis</i>           | 4             | 3.5%                  |
| <i>Staphylococcus sciuri</i>                | 3             | 2.7%                  |
| <i>Staphylococcus saprophyticus</i>         | 2             | 1.8%                  |
| <i>Enterococcus gallinarum</i>              | 1             | 0.9%                  |
| <i>Staphylococcus lentus</i>                | 1             | 0.9%                  |
| <i>Staphylococcus xylosus</i>               | 1             | 0.9%                  |
| <i>Staphylococcus aureus subsp. hominis</i> | 1             | 0.9%                  |
| <i>Enterococcus faecium</i>                 | 1             | 0.9%                  |
| <i>Staphylococcus warneri</i>               | 1             | 0.9%                  |
| <b>Gram-negative bacteria</b>               | 49            | 43.4%                 |
| <i>Proteus mirabilis</i>                    | 20            | 17.7%                 |
| <i>Escherichia coli</i>                     | 10            | 8.8%                  |
| <i>Klebsiella pneumoniae</i>                | 4             | 3.5%                  |
| <i>Proteus hauseri</i>                      | 4             | 3.5%                  |
| <i>Klebsiella oxytoca</i>                   | 3             | 2.7%                  |
| <i>Enterobacter cloacae complex</i>         | 2             | 1.8%                  |
| <i>Acinetobacter baumannii</i>              | 1             | 0.9%                  |
| <i>Citrobacter freundii</i>                 | 1             | 0.9%                  |
| <i>Citrobacter koseri</i>                   | 1             | 0.9%                  |
| <i>Myroides spp.</i>                        | 1             | 0.9%                  |
| <i>Aeromonas hydrophila/caviae</i>          | 1             | 0.9%                  |
| <i>Serratia liquefaciens</i>                | 1             | 0.9%                  |
| <b>Fungus</b>                               | 2             | 1.8%                  |
| <i>Candida parapsilosis</i>                 | 1             | 0.9%                  |
| <i>Candida tropicalis</i>                   | 1             | 0.9%                  |

**Supplementary Table 7** Antimicrobial resistance profiles of the isolated pathogens  
(resistant isolates/tested isolates, %)

|                                    |    |         |                              |    |        |                             |   |         |
|------------------------------------|----|---------|------------------------------|----|--------|-----------------------------|---|---------|
| <i>Staphylococcus aureus</i>       | 34 |         | <i>Proteus mirabilis</i>     | 20 |        | <i>Candida parapsilosis</i> | 1 |         |
| Penicillin                         | 32 | 94.12%  | Cefuroxime axetil            | 19 | 95.00% | Voriconazole                | 1 | 100.00% |
| Erythromycin                       | 24 | 70.59%  | Roxithromycin                | 16 | 80.00% | Fluconazole                 | 1 | 100.00% |
| Clindamycin                        | 24 | 70.59%  | Ceftriaxone                  | 16 | 80.00% | Itraconazole                | 1 | 100.00% |
| Oxacillin                          | 19 | 55.88%  | Co-trimoxazole               | 15 | 75.00% | <i>Candida tropicalis</i>   | 1 |         |
| Cefoxitin screening                | 19 | 55.88%  | Levofloxacin                 | 11 | 55.00% | Voriconazole                | 1 | 100.00% |
| Inducible clindamycin resistance   | 11 | 32.35%  | Cefepime                     | 3  | 15.00% | Fluconazole                 | 1 | 100.00% |
| Moxifloxacin                       | 3  | 8.82%   | Ceftazidime                  | 2  | 10.00% | Itraconazole                | 1 | 100.00% |
| Levofloxacin                       | 3  | 8.82%   | Cefoxitin                    | 2  | 10.00% |                             |   |         |
| Co-trimoxazole                     | 2  | 5.88%   | Amoxicillin / Clavulanate    | 1  | 5.00%  |                             |   |         |
| Gentamicin                         | 2  | 5.88%   | Doxycycline                  | 1  | 5.00%  |                             |   |         |
| Rifampicin                         | 1  | 2.94%   | Ciprofloxacin                | 1  | 5.00%  |                             |   |         |
| Tetracycline                       | 1  | 2.94%   | Minocycline                  | 1  | 5.00%  |                             |   |         |
| <i>Staphylococcus haemolyticus</i> | 8  |         | Piperacillin / Tazobactam    | 1  | 5.00%  |                             |   |         |
| Erythromycin                       | 8  | 100.00% | Colistin                     | 1  | 5.00%  |                             |   |         |
| Clindamycin                        | 8  | 100.00% | <i>Escherichia coli</i>      | 10 |        |                             |   |         |
| Penicillin                         | 8  | 100.00% | Cefuroxime axetil            | 9  | 90.00% |                             |   |         |
| Oxacillin                          | 7  | 87.50%  | ESBLs(+)                     | 7  | 70.00% |                             |   |         |
| Cefoxitin screening                | 7  | 87.50%  | Roxithromycin                | 6  | 60.00% |                             |   |         |
| Gentamicin                         | 6  | 75.00%  | Amoxicillin / Clavulanate    | 5  | 50.00% |                             |   |         |
| Levofloxacin                       | 6  | 75.00%  | Ceftriaxone                  | 5  | 50.00% |                             |   |         |
| Rifampicin                         | 5  | 62.50%  | Cefoxitin                    | 5  | 50.00% |                             |   |         |
| Moxifloxacin                       | 4  | 50.00%  | Levofloxacin                 | 5  | 50.00% |                             |   |         |
| Co-trimoxazole                     | 3  | 37.50%  | Co-trimoxazole               | 4  | 40.00% |                             |   |         |
| Inducible clindamycin resistance   | 2  | 25.00%  | Cefepime                     | 4  | 40.00% |                             |   |         |
| <i>Enterococcus faecalis</i>       | 5  |         | Aztreonam                    | 1  | 10.00% |                             |   |         |
| High level gentamicin synergism    | 5  | 100.00% | Doxycycline                  | 1  | 10.00% |                             |   |         |
| Erythromycin                       | 5  | 100.00% | Ciprofloxacin                | 1  | 10.00% |                             |   |         |
| Levofloxacin                       | 4  | 80.00%  | Minocycline                  | 1  | 10.00% |                             |   |         |
| Ampicillin                         | 2  | 40.00%  | Piperacillin / Tazobactam    | 1  | 10.00% |                             |   |         |
| Penicillin                         | 2  | 40.00%  | Tobramycin                   | 1  | 10.00% |                             |   |         |
| <i>Staphylococcus</i>              | 4  |         | <i>Klebsiella pneumoniae</i> | 4  |        |                             |   |         |

|                                     |   |         |                                               |   |         |
|-------------------------------------|---|---------|-----------------------------------------------|---|---------|
| <i>epidermidis</i>                  |   |         |                                               |   |         |
| Erythromycin                        | 4 | 100.00% | Co-trimoxazole                                | 3 | 75.00%  |
| Penicillin                          | 4 | 100.00% | Cefuroxime axetil                             | 3 | 75.00%  |
| Oxacillin                           | 3 | 75.00%  | Ceftriaxone                                   | 3 | 75.00%  |
| Cefoxitin screening                 | 3 | 75.00%  | Levofloxacin                                  | 3 | 75.00%  |
| Co-trimoxazole                      | 2 | 50.00%  | ESBLs(+)                                      | 2 | 50.00%  |
| Clindamycin                         | 2 | 50.00%  | Amoxicillin /<br>Clavulanate                  | 2 | 50.00%  |
| Levofloxacin                        | 2 | 50.00%  | Roxithromycin                                 | 2 | 50.00%  |
| Moxifloxacin                        | 1 | 25.00%  | Ceftazidime                                   | 2 | 50.00%  |
| Inducible clindamycin<br>resistance | 1 | 25.00%  | Doxycycline                                   | 1 | 25.00%  |
| <i>Staphylococcus sciuri</i>        | 3 |         | Ciprofloxacin                                 | 1 | 25.00%  |
| Oxacillin                           | 3 | 100.00% | Piperacillin /<br>Tazobactam                  | 1 | 25.00%  |
| Erythromycin                        | 3 | 100.00% | Cefepime                                      | 1 | 25.00%  |
| Penicillin                          | 3 | 100.00% | Cefoxitin                                     | 1 | 25.00%  |
| Cefoxitin screening                 | 3 | 100.00% | <i>Proteus hauseri</i>                        | 4 |         |
| Clindamycin                         | 2 | 66.67%  | Roxithromycin                                 | 4 | 100.00% |
| Moxifloxacin                        | 2 | 66.67%  | Tigecycline                                   | 4 | 100.00% |
| Rifampicin                          | 1 | 33.33%  | Cefuroxime axetil                             | 4 | 100.00% |
| Levofloxacin                        | 1 | 33.33%  | Ceftriaxone                                   | 2 | 50.00%  |
| <i>Staphylococcus saprophyticus</i> | 2 |         | <i>Klebsiella oxytoca</i>                     | 3 |         |
| Oxacillin                           | 2 | 100.00% | Cefepime                                      | 3 | 100.00% |
| Erythromycin                        | 2 | 100.00% | Ceftazidime                                   | 3 | 100.00% |
| Penicillin                          | 2 | 100.00% | Co-trimoxazole                                | 2 | 66.67%  |
| Co-trimoxazole                      | 1 | 50.00%  | Cefuroxime axetil                             | 2 | 66.67%  |
| Clindamycin                         | 1 | 50.00%  | Ceftriaxone                                   | 2 | 66.67%  |
| Rifampicin                          | 1 | 50.00%  | ESBLs(+)                                      | 1 | 33.33%  |
| Moxifloxacin                        | 1 | 50.00%  | Aztreonam                                     | 1 | 33.33%  |
| Gentamicin                          | 1 | 50.00%  | Minocycline                                   | 1 | 33.33%  |
| Levofloxacin                        | 1 | 50.00%  | Ticarcillin/Clavulanate                       | 1 | 33.33%  |
| <i>Enterococcus gallinarum</i>      | 1 |         | Levofloxacin                                  | 1 | 33.33%  |
| High level gentamicin<br>synergism  | 1 | 100.00% | <i>Enterobacter cloacae</i><br><i>complex</i> | 2 |         |
| Erythromycin                        | 1 | 100.00% | Ceftazidime                                   | 2 | 100.00% |
| Levofloxacin                        | 1 | 100.00% | Aztreonam                                     | 1 | 50.00%  |
| <i>Staphylococcus lentus</i>        | 1 |         | Co-trimoxazole                                | 1 | 50.00%  |
| Erythromycin                        | 1 | 100.00% | Piperacillin /<br>Tazobactam                  | 1 | 50.00%  |
| Penicillin                          | 1 | 100.00% | Ticarcillin/Clavulanate                       | 1 | 50.00%  |

|                                             |   |         |                                    |   |         |
|---------------------------------------------|---|---------|------------------------------------|---|---------|
| Inducible clindamycin resistance            | 1 | 100.00% | Cefoperazone / Sulbactam           | 1 | 50.00%  |
| <i>Staphylococcus xylosus</i>               | 1 |         | Levofloxacin                       | 1 | 50.00%  |
| Oxacillin                                   | 1 | 100.00% | <i>Acinetobacter baumannii</i>     | 1 |         |
| Co-trimoxazole                              | 1 | 100.00% | Piperacillin / Tazobactam          | 1 | 100.00% |
| Erythromycin                                | 1 | 100.00% | Tigecycline                        | 1 | 100.00% |
| Clindamycin                                 | 1 | 100.00% | Cefoperazone / Sulbactam           | 1 | 100.00% |
| Penicillin                                  | 1 | 100.00% | Ceftazidime                        | 1 | 100.00% |
| Cefoxitin screening                         | 1 | 100.00% | Imipenem                           | 1 | 100.00% |
| <i>Staphylococcus aureus subsp. hominis</i> | 1 |         | Levofloxacin                       | 1 | 100.00% |
| Doxycycline                                 | 1 | 100.00% | <i>Citrobacter freundii</i>        | 1 |         |
| Co-trimoxazole                              | 1 | 100.00% | Piperacillin / Tazobactam          | 1 | 100.00% |
| Ciprofloxacin                               | 1 | 100.00% | Ceftriaxone                        | 1 | 100.00% |
| Minocycline                                 | 1 | 100.00% | Ceftazidime                        | 1 | 100.00% |
| Colistin                                    | 1 | 100.00% | <i>Citrobacter koseri</i>          | 1 |         |
| Levofloxacin                                | 1 | 100.00% | Roxithromycin                      | 1 | 100.00% |
| <i>Enterococcus faecium</i>                 | 1 |         | Cefuroxime axetil                  | 1 | 100.00% |
| Ampicillin                                  | 1 | 100.00% | Cefoxitin                          | 1 | 100.00% |
| High level gentamicin synergism             | 1 | 100.00% | <i>Myroides spp.</i>               | 1 |         |
| Erythromycin                                | 1 | 100.00% | Amikacin                           | 1 | 100.00% |
| Penicillin                                  | 1 | 100.00% | Aztreonam                          | 1 | 100.00% |
| Levofloxacin                                | 1 | 100.00% | Piperacillin / Tazobactam          | 1 | 100.00% |
| <i>Staphylococcus warneri</i>               | 1 |         | Ticarcillin/Clavulanate            | 1 | 100.00% |
| Oxacillin                                   | 1 | 100.00% | Cefoperazone / Sulbactam           | 1 | 100.00% |
| Erythromycin                                | 1 | 100.00% | Ceftazidime                        | 1 | 100.00% |
| Clindamycin                                 | 1 | 100.00% | Tobramycin                         | 1 | 100.00% |
| Penicillin                                  | 1 | 100.00% | Imipenem                           | 1 | 100.00% |
| Cefoxitin screening                         | 1 | 100.00% | Colistin                           | 1 | 100.00% |
| Levofloxacin                                | 1 | 100.00% | <i>Aeromonas hydrophila/caviae</i> | 1 |         |
|                                             |   |         | Co-trimoxazole                     | 1 | 100.00% |
|                                             |   |         | Piperacillin / Tazobactam          | 1 | 100.00% |
|                                             |   |         | Cefoxitin                          | 1 | 100.00% |
|                                             |   |         | <i>Serratia liquefaciens</i>       | 1 |         |
|                                             |   |         | Amoxicillin / Clavulanate          | 1 | 100.00% |

|                   |   |         |
|-------------------|---|---------|
| Roxithromycin     | 1 | 100.00% |
| Cefuroxime axetil | 1 | 100.00% |
| Cefoxitin         | 1 | 100.00% |
